# Supplementary material for: Structure–property relationship study of blue thermally activated delayed fluorescence molecules with different donor and position substitutions: theoretical perspective and molecular design
Source: Royal Society of Chemistry journal article supplement (doi:10.1039/d1tc04656j), 2021-11-01
Supplement: d1tc04656j1.pdf [file d1tc04656j1.pdf]

***Supplementary Information***

Structure-Property Relationship Study of Blue Thermally Activated  
Delayed Fluorescence Molecules with Different donor and position  
substitutions: Theoretical Perspective and Molecular Design

Yuzhi Song\*, Bihe Li, Songsong Liu, Ming Qin, Yang Gao, Kai Zhang, Lili Lin, Chuan-Kui Wang, Jianzhong

Fan\*

Shandong Key Laboratory of Medical Physics and Image Processing & Shandong Provincial  
Engineering and Technical Center of Light Manipulations, School of Physics and Electronics,  
Shandong Normal University, Jinan 250358, China

**Corresponding Author**

\*Author to whom correspondence should be addressed.

E-mail: fanjianzhongvip@163.com (J. Fan) and yzsong@sdu.edu.cn (Y. Song).

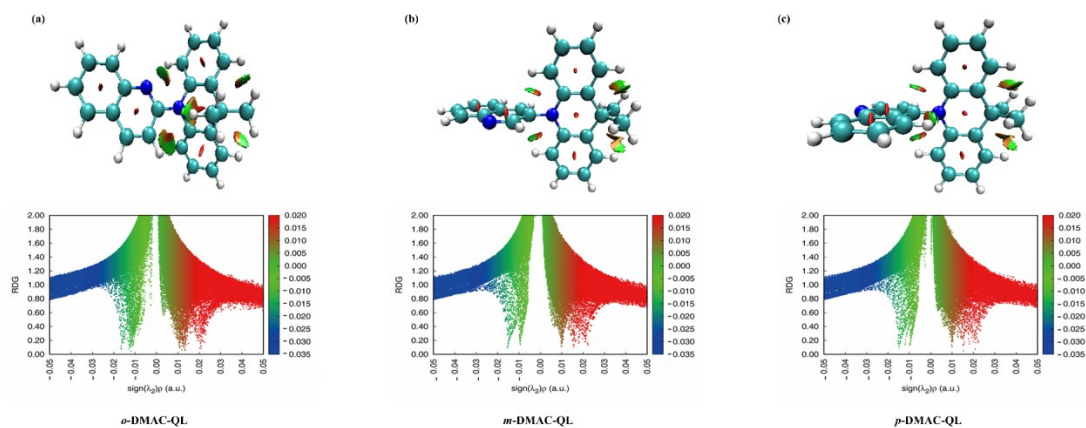

**Figure S1.** Reduced density gradient (RDG) isosurface maps (upper) and scatter graphs (lower) of RDG versus  $\text{sign}(\lambda_2)\rho$  (a.u.) of *o*-DMAC-QL, *m*-DMAC-QL and *p*-DMAC-QL.

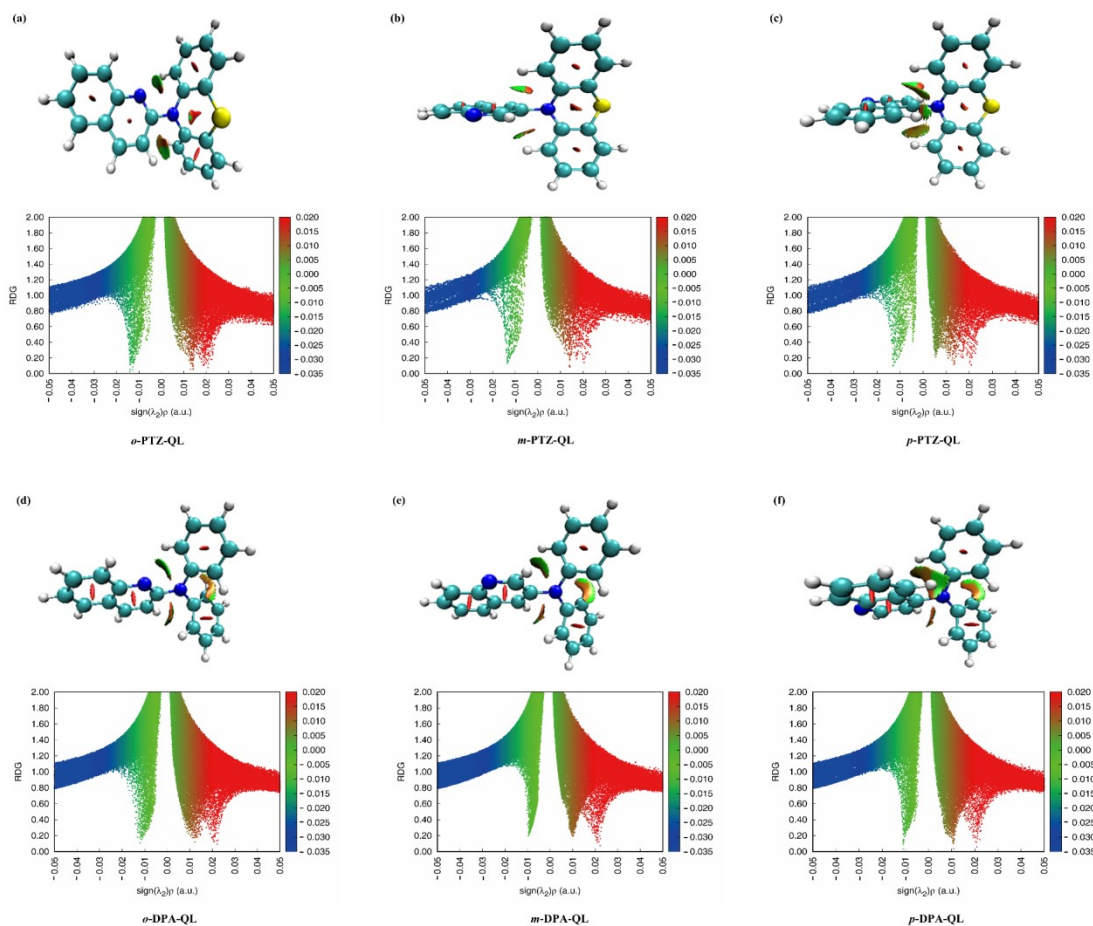

**Figure S2.** Reduced density gradient (RDG) isosurface maps (upper) and scatter graphs (lower) of RDG versus  $\text{sign}(\lambda_2)\rho$  (a.u.) of *o*-PTZ-QL, *m*-PTZ-QL, *p*-PTZ-QL, *o*-DPA-QL, *m*-DPA-QL and *p*-DPA-QL.

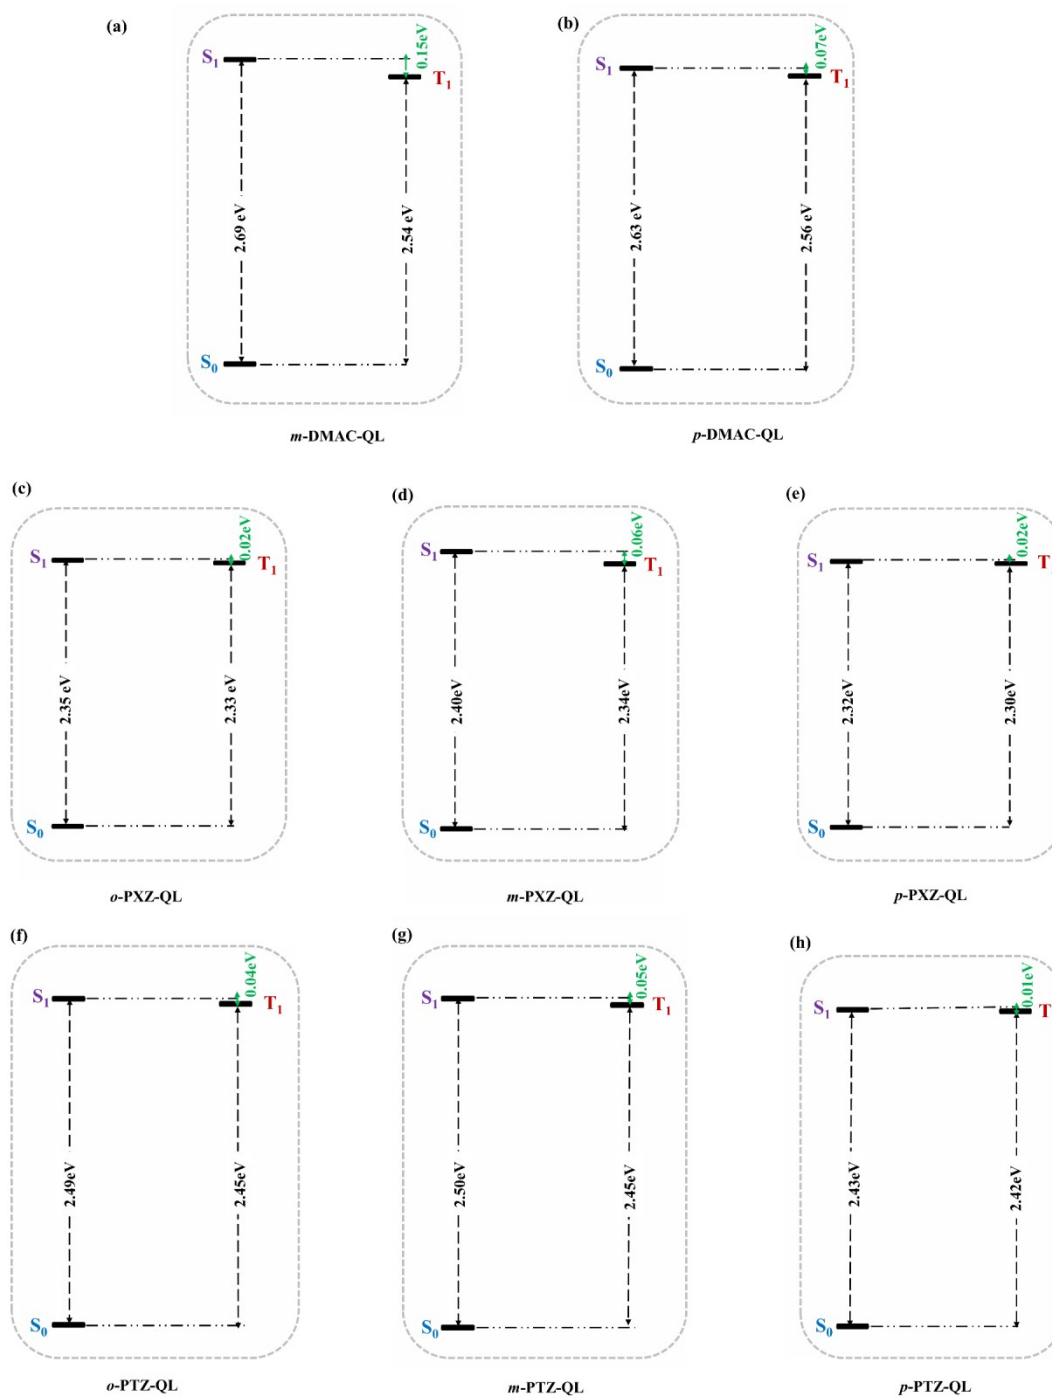

**Figure S3.** Adiabatic excitation energies for *m*-DMAC-QL, *p*-DMAC-QL, *o*-PXZ-QL, *m*-PXZ-QL, *p*-PXZ-QL, *o*-PTZ-QL, *m*-PTZ-QL and *p*-PTZ-QL in tetrahydrofuran, respectively.

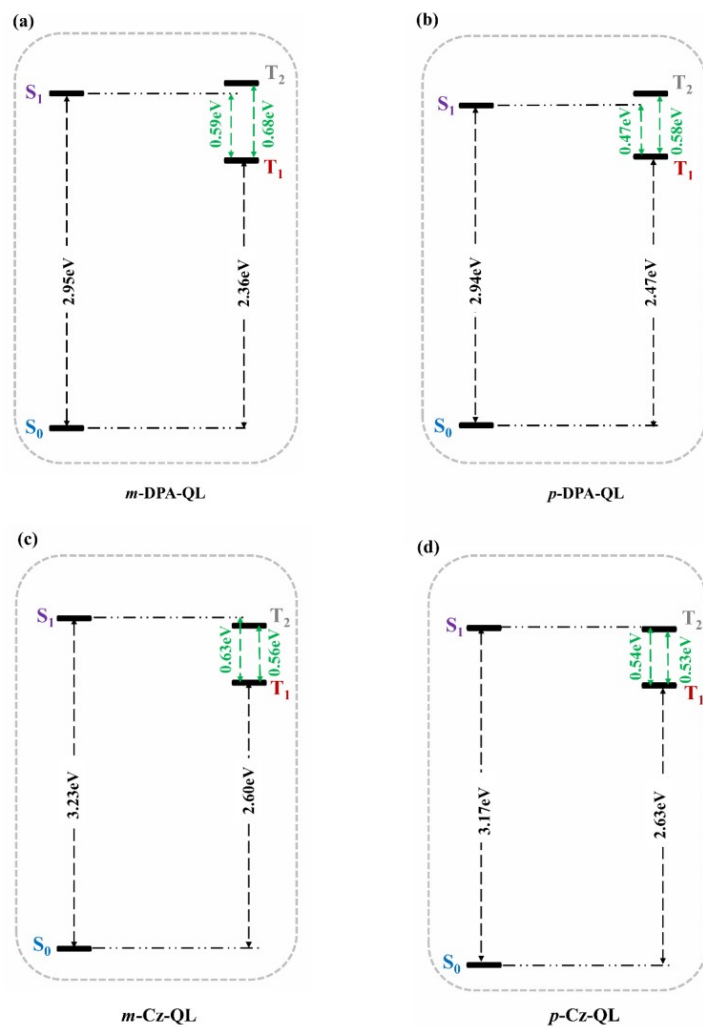

**Figure S4.** Adiabatic excitation energies for *m*-DPA-QL, *p*-DPA-QL, *m*-Cz-QL and *p*-Cz-QL, respectively.

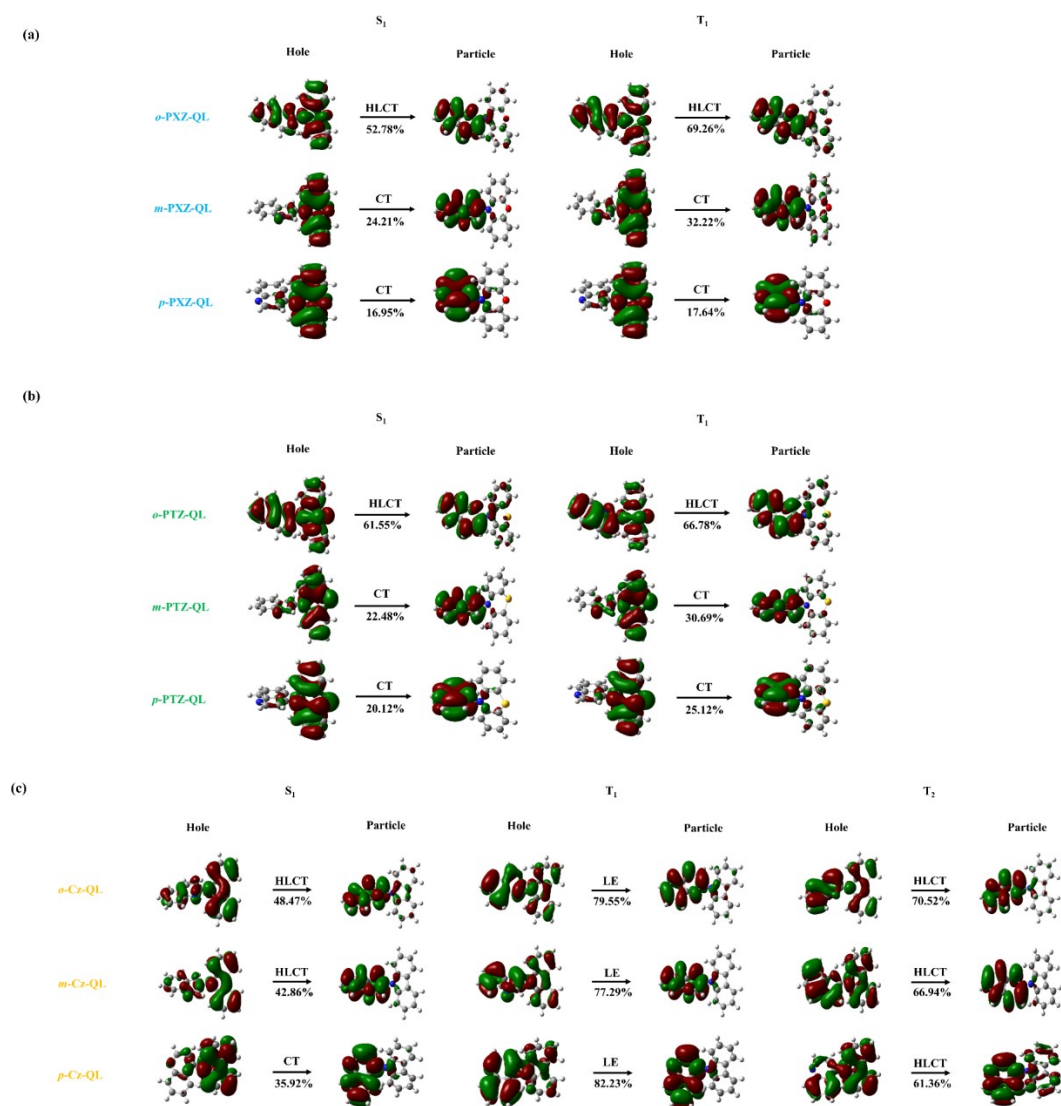

**Figure S5.** Natural transition orbitals (NTOs) of the  $S_1$  and  $T_n$  states for *o*-PXZ-QL, *m*-PXZ-QL, *p*-PXZ-QL, *o*-PTZ-QL, *m*-PTZ-QL, *p*-PTZ-QL, *o*-Cz-QL, *m*-Cz-QL and *p*-Cz-QL in tetrahydrofuran. The values below the arrows are the LE proportion in excitation.

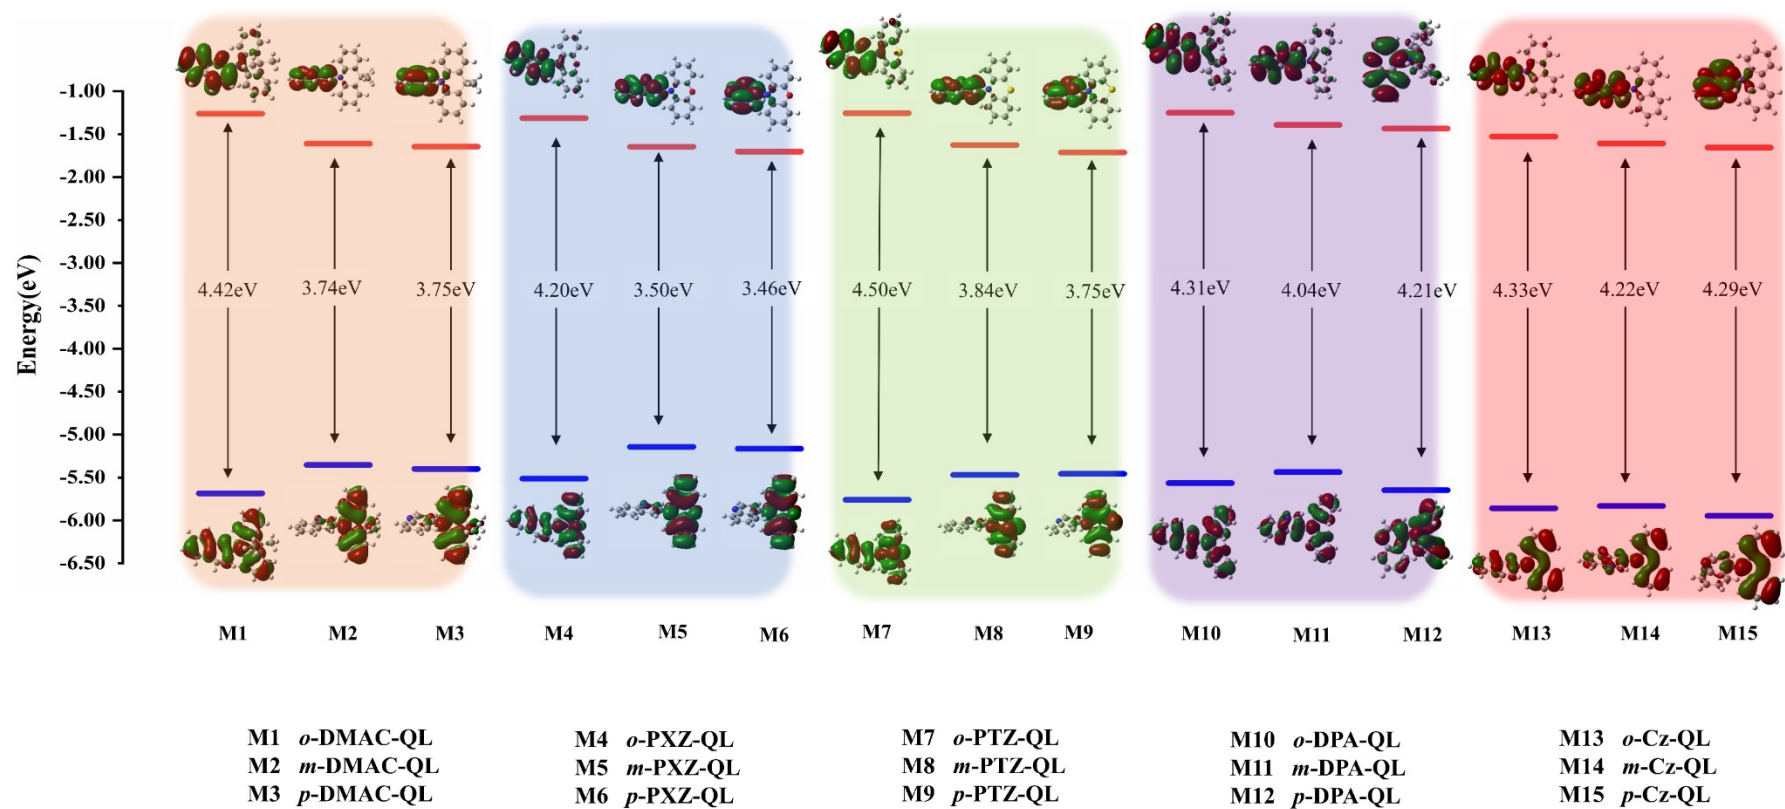

**Figure S6.** Energies and distributions of HOMO (blue lines) and LUMO (red lines) for all molecules in tetrahydrofuran.

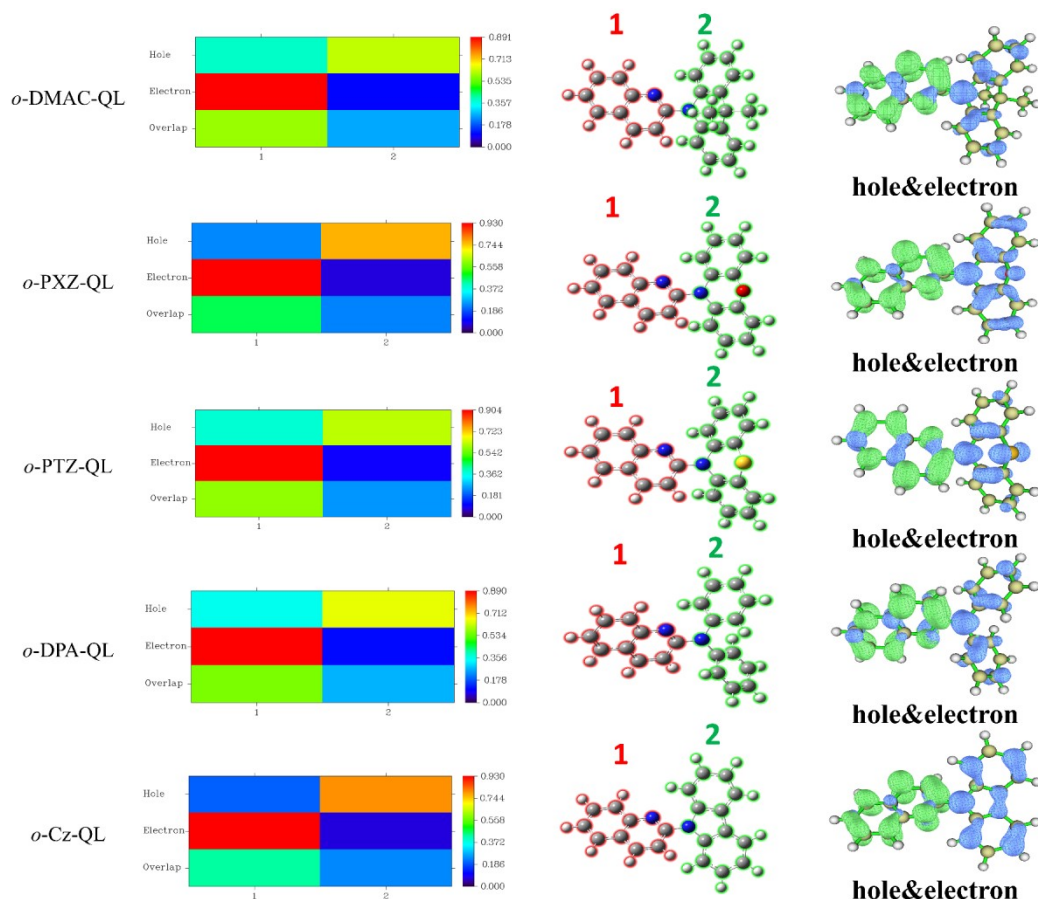

**Figure S7.** Isosurface distributions of holes and electrons and heat map of the  $S_1$  state for *o*-DMAC-QL, *o*-PXZ-QL, *o*-PTZ-QL, *o*-DPA-QL and *o*-Cz-QL in tetrahydrofuran.

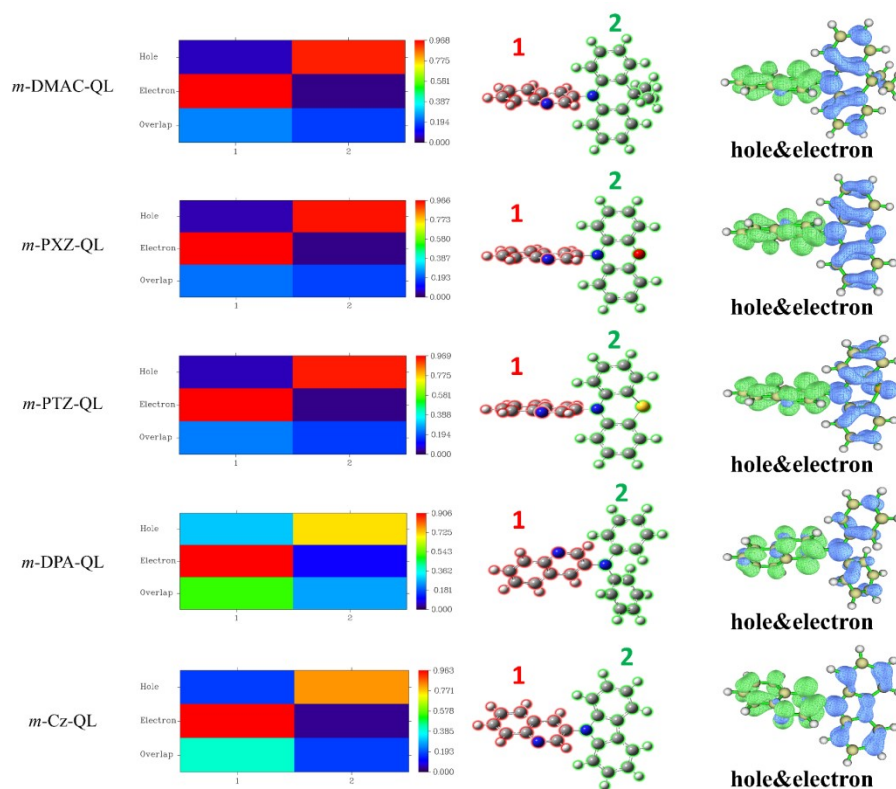

**Figure S8.** Isosurface distributions of holes and electrons and heat map of the  $S_1$  state for *m*-DMAC-QL, *m*-PXZ-QL, *m*-PTZ-QL, *m*-DPA-QL and *m*-Cz-QL in tetrahydrofuran.

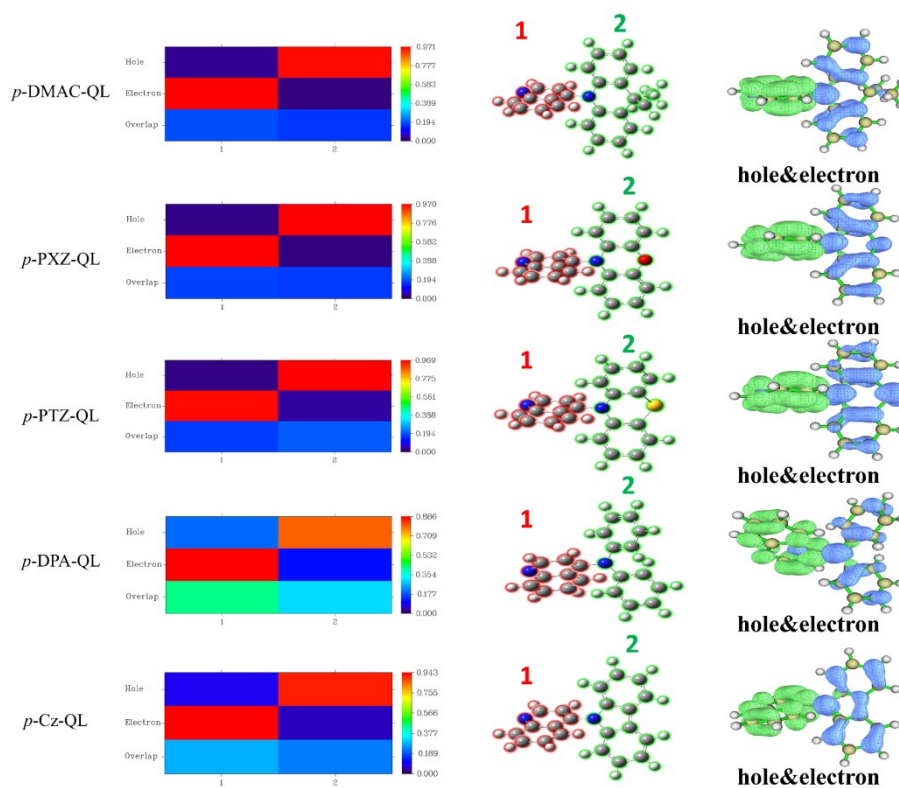

**Figure S9.** Isosurface distributions of holes and electrons and heat map of the  $S_1$  state for *p*-DMAC-QL, *p*-PXZ-QL, *p*-PTZ-QL, *p*-DPA-QL and *p*-Cz-QL in tetrahydrofuran.



**Table S1.** Orbital energies of HOMO and LUMO, energy gaps ( $\epsilon_{\text{gap}}$ ) and overlaps (S).

|                   | HOMO (eV) | LUMO (eV) | $\epsilon_{\text{gap}}$ (eV) | S    |
|-------------------|-----------|-----------|------------------------------|------|
| <i>o</i> -DMAC-QL | -5.68     | -1.26     | 4.42                         | 0.61 |
| <i>m</i> -DMAC-QL | -5.35     | -1.61     | 3.74                         | 0.21 |
| <i>p</i> -DMAC-QL | -5.40     | -1.64     | 3.75                         | 0.15 |
| <i>o</i> -PXZ-QL  | -5.51     | -1.31     | 4.20                         | 0.52 |
| <i>m</i> -PXZ-QL  | -5.14     | -1.65     | 3.50                         | 0.21 |
| <i>p</i> -PXZ-QL  | -5.16     | -1.70     | 3.46                         | 0.15 |
| <i>o</i> -PTZ-QL  | -5.76     | -1.25     | 4.50                         | 0.60 |
| <i>m</i> -PTZ-QL  | -5.47     | -1.63     | 3.84                         | 0.20 |
| <i>p</i> -PTZ-QL  | -5.46     | -1.71     | 3.75                         | 0.17 |
| <i>o</i> -DPA-QL  | -5.56     | -1.25     | 4.31                         | 0.60 |
| <i>m</i> -DPA-QL  | -5.44     | -1.39     | 4.04                         | 0.61 |
| <i>p</i> -DPA-QL  | -5.65     | -1.43     | 4.21                         | 0.58 |
| <i>o</i> -Cz-QL   | -5.86     | -1.53     | 4.33                         | 0.47 |
| <i>m</i> -Cz-QL   | -5.83     | -1.61     | 4.22                         | 0.42 |
| <i>p</i> -Cz-QL   | -5.95     | -1.66     | 4.29                         | 0.37 |

The  $\epsilon_{\text{gap}}$  and S are the energy gap and the orbital overlap integral between the HOMO and LUMO, respectively.

**Table S2.** The LE proportion in excitation and the difference of LE components between  $S_1$  and  $T_n$  states for total 15 molecules.

|                   | $S_1$  | $T_1$  | $T_2$  | Difference between $T_1-S_1$ | Difference between $T_2-S_1$ |
|-------------------|--------|--------|--------|------------------------------|------------------------------|
| <i>o</i> -DMAC-QL | 60.71% | 75.47% | \      | 14.75%                       | \                            |
| <i>m</i> -DMAC-QL | 24.22% | 29.97% | \      | 5.74%                        | \                            |
| <i>p</i> -DMAC-QL | 17.54% | 19.02% | \      | 1.48%                        | \                            |
| <i>o</i> -PXZ-QL  | 52.78% | 69.26% | \      | 16.48%                       | \                            |
| <i>m</i> -PXZ-QL  | 24.21% | 32.22% | \      | 8.01%                        | \                            |
| <i>p</i> -PXZ-QL  | 16.95% | 17.64% | \      | 0.69%                        | \                            |
| <i>o</i> -PTZ-QL  | 61.55% | 66.78% | \      | 5.23%                        | \                            |
| <i>m</i> -PTZ-QL  | 22.48% | 30.69% | \      | 8.21%                        | \                            |
| <i>p</i> -PTZ-QL  | 20.12% | 25.12% | \      | 4.99%                        | \                            |
| <i>o</i> -DPA-QL  | 60.47% | 74.26% | 82.99% | 13.79%                       | 22.52%                       |
| <i>m</i> -DPA-QL  | 59.28% | 76.07% | 77.28% | 16.79%                       | 18.00%                       |
| <i>p</i> -DPA-QL  | 55.41% | 77.62% | 75.51% | 22.21%                       | 20.09%                       |
| <i>o</i> -Cz-QL   | 48.47% | 79.55% | 70.52% | 31.08%                       | 22.05%                       |
| <i>m</i> -Cz-QL   | 42.86% | 77.29% | 66.94% | 34.43%                       | 24.08%                       |
| <i>p</i> -Cz-QL   | 35.92% | 82.23% | 61.36% | 46.31%                       | 25.44%                       |

**Table S3.** Calculated intersystem crossing rates ( $K_{ISC}$ ) and reverse intersystem crossing rates ( $K_{RISC}$ ) between the singlet and triplet excited states of all molecules.

|                   | $K_{ISC}$<br>( $S_1 \rightarrow T_1$ )<br>( $s^{-1}$ ) | $K_{ISC}$<br>( $S_1 \rightarrow T_2$ )<br>( $s^{-1}$ ) | $K_{RISC}$<br>( $T_1 \rightarrow S_1$ )<br>( $s^{-1}$ ) | $K_{RISC}$<br>( $T_2 \rightarrow S_1$ )<br>( $s^{-1}$ ) |
|-------------------|--------------------------------------------------------|--------------------------------------------------------|---------------------------------------------------------|---------------------------------------------------------|
| <i>o</i> -DMAC-QL | $1.75 \times 10^4$                                     |                                                        | $8.84 \times 10^6$                                      |                                                         |
| <i>m</i> -DMAC-QL | $3.34 \times 10^6$                                     |                                                        | $6.09 \times 10^5$                                      |                                                         |
| <i>p</i> -DMAC-QL | $2.88 \times 10^5$                                     |                                                        | $2.18 \times 10^7$                                      |                                                         |
| <i>o</i> -PXZ-QL  | $6.08 \times 10^4$                                     |                                                        | $3.30 \times 10^8$                                      |                                                         |
| <i>m</i> -PXZ-QL  | $2.44 \times 10^6$                                     |                                                        | $2.47 \times 10^7$                                      |                                                         |
| <i>p</i> -PXZ-QL  | $5.38 \times 10^5$                                     |                                                        | $1.23 \times 10^8$                                      |                                                         |
| <i>o</i> -PTZ-QL  | $8.52 \times 10^4$                                     |                                                        | $1.04 \times 10^5$                                      |                                                         |
| <i>m</i> -PTZ-QL  | $5.45 \times 10^6$                                     |                                                        | $2.54 \times 10^6$                                      |                                                         |
| <i>p</i> -PTZ-QL  | $7.85 \times 10^5$                                     |                                                        | $4.48 \times 10^6$                                      |                                                         |
| <i>o</i> -DPA-QL  | $3.13 \times 10^7$                                     | $1.04 \times 10^7$                                     | $1.41 \times 10^1$                                      | $1.07 \times 10^7$                                      |
| <i>m</i> -DPA-QL  | $1.72 \times 10^7$                                     | $7.07 \times 10^5$                                     | $2.16 \times 10^{-2}$                                   | $3.18 \times 10^8$                                      |
| <i>p</i> -DPA-QL  | $1.52 \times 10^8$                                     | $6.85 \times 10^4$                                     | $2.41 \times 10^0$                                      | $1.64 \times 10^7$                                      |
| <i>o</i> -Cz-QL   | $3.77 \times 10^6$                                     | $2.85 \times 10^8$                                     | $2.04 \times 10^0$                                      | $8.14 \times 10^5$                                      |
| <i>m</i> -Cz-QL   | $9.83 \times 10^6$                                     | $2.59 \times 10^8$                                     | $7.84 \times 10^{-4}$                                   | $1.89 \times 10^7$                                      |
| <i>p</i> -Cz-QL   | $3.69 \times 10^7$                                     | $4.33 \times 10^5$                                     | $7.27 \times 10^{-3}$                                   | $2.11 \times 10^5$                                      |

**Table S4.** Total reorganization energies between  $S_1$  and  $S_0$  of 15 molecules in tetrahydrofuran.

|                   | Reorganization energy<br>( $cm^{-1}$ ) |
|-------------------|----------------------------------------|
| <i>o</i> -DMAC-QL | 16093.94                               |

|                   |          |
|-------------------|----------|
| <i>m</i> -DMAC-QL | 1492.42  |
| <i>p</i> -DMAC-QL | 1490.64  |
| <i>o</i> -PXZ-QL  | 10171.06 |
| <i>m</i> -PXZ-QL  | 2071.93  |
| <i>p</i> -PXZ-QL  | 1827.46  |
| <i>o</i> -PTZ-QL  | 17080.32 |
| <i>m</i> -PTZ-QL  | 4407.28  |
| <i>p</i> -PTZ-QL  | 3019.29  |
| <i>o</i> -DPA-QL  | 5838.92  |
| <i>m</i> -DPA-QL  | 2818.24  |
| <i>p</i> -DPA-QL  | 4660.44  |
| <i>o</i> -Cz-QL   | 1994.44  |
| <i>m</i> -Cz-QL   | 1457.75  |
| <i>p</i> -Cz-QL   | 1978.16  |

**Table S5.** Calculated spin-orbit coupling constants (in  $\text{cm}^{-1}$ ) between the  $S_0$  and  $T_1$  for all molecules in tetrahydrofuran (THF).

|                   | $\langle S_0   \hat{H}_{so}   T_1 \rangle$ |                                     |                                     |                               |
|-------------------|--------------------------------------------|-------------------------------------|-------------------------------------|-------------------------------|
|                   | X-component<br>( $\text{cm}^{-1}$ )        | Y-component<br>( $\text{cm}^{-1}$ ) | Z-component<br>( $\text{cm}^{-1}$ ) | Total<br>( $\text{cm}^{-1}$ ) |
| <i>o</i> -DMAC-QL | 2.78                                       | -1.36                               | 1.79                                | 3.57                          |
| <i>m</i> -DMAC-QL | 1.54                                       | -1.36                               | -2.27                               | 3.06                          |
| <i>p</i> -DMAC-QL | 1.46                                       | -1.03                               | -1.14                               | 1.92                          |
| <i>o</i> -PXZ-QL  | 1.87                                       | 1.06                                | -2.48                               | 3.28                          |
| <i>m</i> -PXZ-QL  | -1.61                                      | 1.59                                | -2.43                               | 3.32                          |
| <i>p</i> -PXZ-QL  | -1.93                                      | -3.00                               | 0.48                                | 2.02                          |
| <i>o</i> -PTZ-QL  | -2.27                                      | $-9.62 \times 10^{-4}$              | 2.28                                | 3.21                          |
| <i>m</i> -PTZ-QL  | 1.19                                       | $5.61 \times 10^{-4}$               | -2.85                               | 3.09                          |
| <i>p</i> -PTZ-QL  | -1.03                                      | $-1.98 \times 10^{-4}$              | 5.99                                | 1.12                          |
| <i>o</i> -DPA-QL  | 2.31                                       | 0.84                                | 0.80                                | 2.59                          |
| <i>m</i> -DPA-QL  | -1.14                                      | -1.03                               | -1.14                               | 1.92                          |
| <i>p</i> -DPA-QL  | -1.15                                      | 0.26                                | 0.16                                | 1.19                          |
| <i>o</i> -Cz-QL   | -0.67                                      | -0.92                               | 0.86                                | 1.43                          |
| <i>m</i> -Cz-QL   | -1.23                                      | 1.05                                | 1.19                                | 2.00                          |
| <i>p</i> -Cz-QL   | -0.53                                      | 0.33                                | -0.17                               | 0.65                          |

**Table S6.** Electric emission transition dipole moments of total 15 molecules.

| $\mu$ (Debye)     |      |
|-------------------|------|
| <i>o</i> -DMAC-QL | 0.28 |

|                   |      |
|-------------------|------|
| <i>m</i> -DMAC-QL | 0.29 |
| <i>p</i> -DMAC-QL | 0.07 |
| -----             |      |
| <i>o</i> -PXZ-QL  | 0.04 |
| <i>m</i> -PXZ-QL  | 0.06 |
| <i>p</i> -PXZ-QL  | 0.05 |
| -----             |      |
| <i>o</i> -PTZ-QL  | 0.13 |
| <i>m</i> -PTZ-QL  | 0.20 |
| <i>p</i> -PTZ-QL  | 0.05 |
| -----             |      |
| <i>o</i> -DPA-QL  | 2.45 |
| <i>m</i> -DPA-QL  | 2.99 |
| <i>p</i> -DPA-QL  | 2.20 |
| -----             |      |
| <i>o</i> -Cz-QL   | 2.77 |
| <i>m</i> -Cz-QL   | 2.37 |
| <i>p</i> -Cz-QL   | 0.04 |
| -----             |      |
